# Supplementary material for: Plasma Oxalate as a Predictor of Kidney Function Decline in a Primary Hyperoxaluria Cohort
Source: PubMed Central journal article supplement (PMC7279271; doi:10.3390/ijms21103608), 2020-05-20
Supplement: ijms-21-03608-s001.pdf [file ijms-21-03608-s001.pdf]

**Supplemental Table S1. ESKD rates per plasma oxalate quartile during follow-up, by CKD stage**

|                                                     | CKD Stage        |                     |                      |                      |
|-----------------------------------------------------|------------------|---------------------|----------------------|----------------------|
|                                                     | Stage 1<br>(≥90) | Stage 2<br>(60-<90) | Stage 3a<br>(45-<60) | Stage 3b<br>(30-<45) |
| <b>Number f/u intervals beginning at this level</b> |                  |                     |                      |                      |
| Q1                                                  | 48               | 75                  | 42                   | 10                   |
| Q2                                                  | 41               | 69                  | 41                   | 9                    |
| Q3                                                  | 40               | 74                  | 41                   | 10                   |
| Q4                                                  | 42               | 70                  | 41                   | 9                    |
| <b>Person-years at this level</b>                   |                  |                     |                      |                      |
| Q1                                                  | 117              | 191                 | 84                   | 3                    |
| Q2                                                  | 81               | 200                 | 57                   | 1                    |
| Q3                                                  | 89               | 125                 | 64                   | 4                    |
| Q4                                                  | 73               | 108                 | 42                   | 7                    |
| <b>ESRD events at this level</b>                    |                  |                     |                      |                      |
| Q1                                                  | 0                | 1                   | 2                    | 13                   |
| Q2                                                  | 1                | 3                   | 3                    | 12                   |
| Q3                                                  | 1                | 3                   | 2                    | 9                    |
| Q4                                                  | 2                | 8                   | 12                   | 3                    |
| <b>ESRD rate per 100 person years (95% CI)</b>      |                  |                     |                      |                      |
| Q1                                                  | 0.0 (0.0, 3.2)   | 0.5 (0.0, 2.9)      | 2.4 (0.3, 8.6)       | 23.1 (4.8, 67.4)     |
| Q2                                                  | 1.2 (0.0, 6.9)   | 1.5 (0.3, 4.4)      | 5.3 (1.1, 15.4)      | 8.3 (0.2, 46.4)      |
| Q3                                                  | 1.1 (0.0, 6.3)   | 2.4 (0.5, 7.0)      | 3.1 (0.4, 11.3)      | 44.4 (12.1, 114)     |
| Q4                                                  | 2.7 (0.3, 9.9)   | 7.4 (3.2, 14.6)     | 28.6 (14.8, 49.9)    | 233 (93.8, 481)      |
